# Supplementary material
Source: PubMed Central journal article supplement (PMC5042832)
Supplement: NIHMS801211-supplement-2.pdf [file NIHMS801211-supplement-2.pdf]

---

## Data S2

# DNA shape features improve transcription factor binding site predictions *in vivo*

ANTHONY MATHÉLIER<sup>1,2</sup>, BEIBEI XIN<sup>3</sup>, TSU-PEI CHIU<sup>3</sup>,  
LIN YANG<sup>3</sup>, REMO ROHS<sup>3,\*</sup>, AND WYETH W. WASSERMAN<sup>1,\*</sup>

<sup>1</sup> Centre for Molecular Medicine at the Child and Family Research Institute,  
Department of Medical Genetics, University of British Columbia,  
980 West 28th Avenue, V5Z 4H4, Vancouver, BC, Canada

<sup>2</sup> Centre for Molecular Medicine Norway (NCMM), Nordic EMBL Partnership,  
University of Oslo and Oslo University Hospital, Norway

<sup>3</sup> Molecular and Computational Biology Program, Departments of Biological Sciences,  
Chemistry, Physics, and Computer Science,  
University of Southern California, Los Angeles, CA 90089, USA

\* Co-corresponding authors

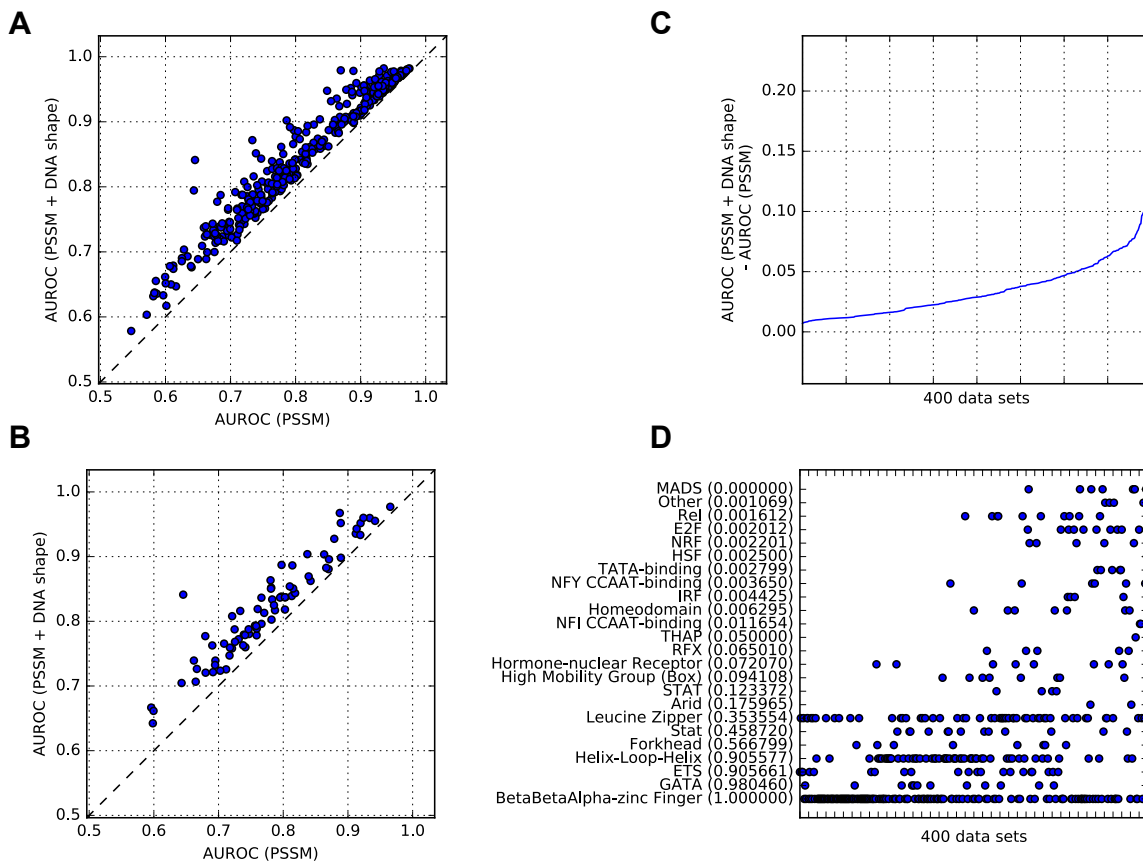

Related to Figure 2. Impact of DNA shape on predicting TFBSs. **A.** Comparison of the AUROC obtained for the 400 ENCODE human ChIP-seq data sets when using either the PSSM scores (x-axis) or the classifiers combining PSSM scores and DNA shape features (y-axis). The dashed line represents equal AUROC values obtained with the two methods. **B.** Comparison of the median AUROC over all ChIP-seq data sets associated with each TF (one data point per TF) when using either the PSSM scores (x-axis) or the PSSM + DNA shape classifiers (y-axis). The dashed line represents equal AUROC values obtained with the two methods. **C.** Improvement in predictive power obtained when considering DNA shape features (y-axis) as the difference between the AUROC values obtained with the PSSM + DNA shape classifiers and PSSM scores. The higher the difference, the stronger the improvement when DNA shape information is incorporated. Note that the data sets (x-axis) were ranked by increasing difference values. **D.** For each TF family (y-axis), an associated data set is represented at the corresponding x-coordinate where the data set appears in B. The name of the TF families are given on the y-axis along with the Mann-Whitney U test p-values of enrichment for significant improvement in parenthesis. Note that the given p-values are not corrected for multiple hypothesis testing.

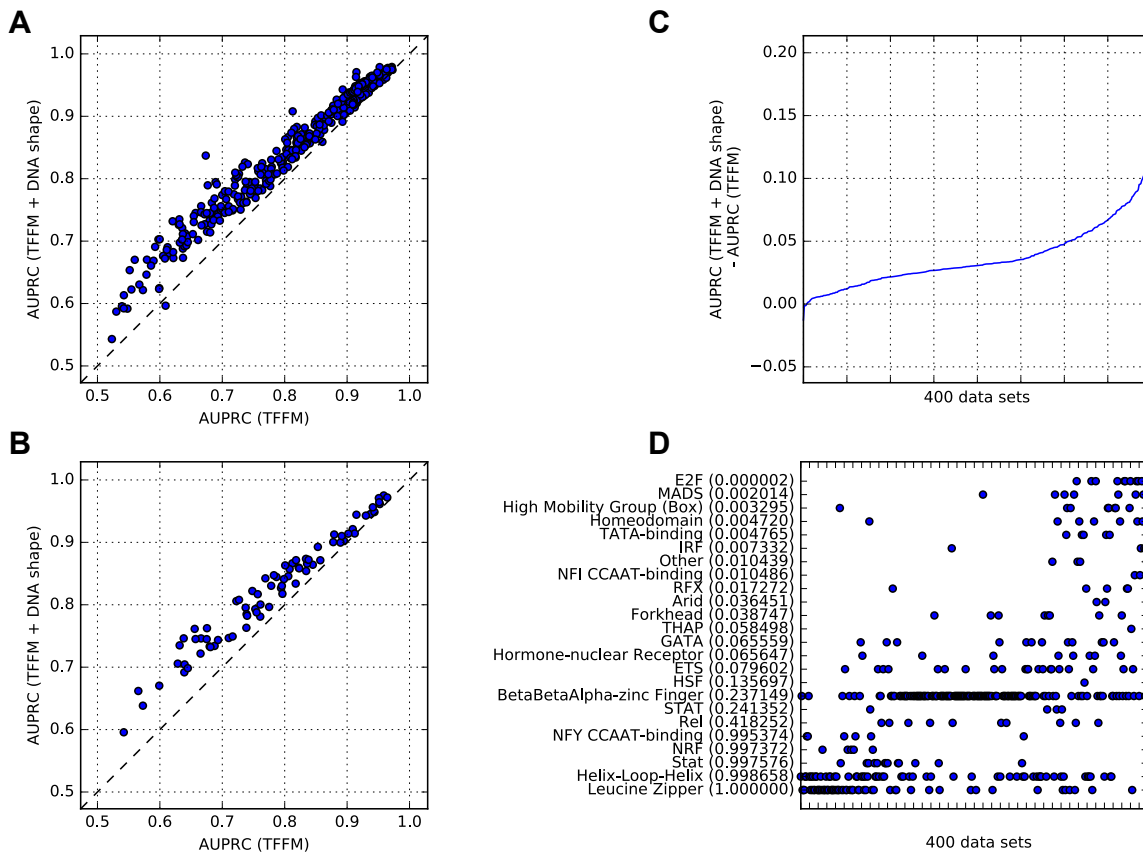

Related to Figure 2. Impact of DNA shape on predicting TFBSs. **A.** Comparison of the AUPRC obtained for the 400 ENCODE human ChIP-seq data sets when using either the TFFM scores (x-axis) or the classifiers combining TFFM scores and DNA shape features (y-axis). The dashed line represents equal AUPRC values obtained with the two methods. **B.** Comparison of the median AUPRC over all ChIP-seq data sets associated with each TF (one point per TF) when using either the TFFM scores (x-axis) or the TFFM + DNA shape classifiers (y-axis). The dashed line represents equal AUPRC values obtained with the two methods. **C.** Improvement in predictive power obtained when considering DNA shape features (y-axis) as the difference between the AUPRC values obtained with the TFFM + DNA shape classifiers and TFFM scores. The higher the difference, the stronger the improvement when DNA shape information is incorporated. Note that the data sets (x-axis) were ranked by increasing difference values. **D.** For each TF family (y-axis), an associated data set is represented at the corresponding x-coordinate where the data set appears in B. The name of the TF families are given on the y-axis along with the Mann-Whitney U test p-values of enrichment for significant improvement in parenthesis. Note that the given p-values are not corrected for multiple hypothesis testing.

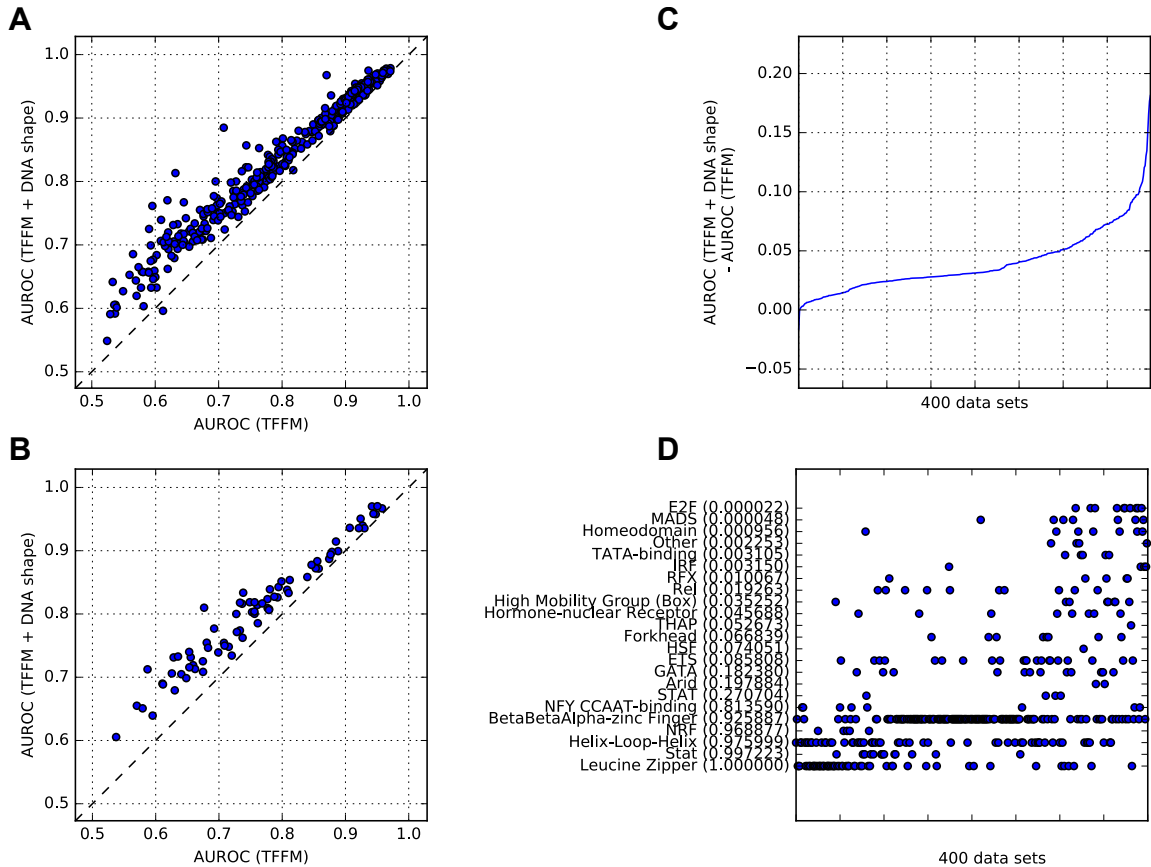

Related to Figure 2. Impact of DNA shape on predicting TFBSs. **A.** Comparison of the AUROC obtained for the 400 ENCODE human ChIP-seq data sets when using either the TFFM scores (x-axis) or the classifiers combining TFFM scores and DNA shape features (y-axis). The dashed line represents equal AUROC values obtained with the two methods. **B.** Comparison of the median AUROC over all ChIP-seq data sets associated with each TF (one point per TF) when using either the TFFM scores (x-axis) or the TFFM + DNA shape classifiers (y-axis). The dashed line represents equal AUROC values obtained with the two methods. **C.** Improvement in predictive power obtained when considering DNA shape features (y-axis) as the difference between the AUROC values obtained with the TFFM + DNA shape classifiers and TFFM scores. The higher the difference, the stronger the improvement when DNA shape information is incorporated. Note that the data sets (x-axis) were ranked by increasing difference values. **D.** For each TF family (y-axis), an associated data set is represented at the corresponding x-coordinate where the data set appears in B. The name of the TF families are given on the y-axis along with the Mann-Whitney U test p-values of enrichment for significant improvement in parenthesis. Note that the given p-values are not corrected for multiple hypothesis testing.

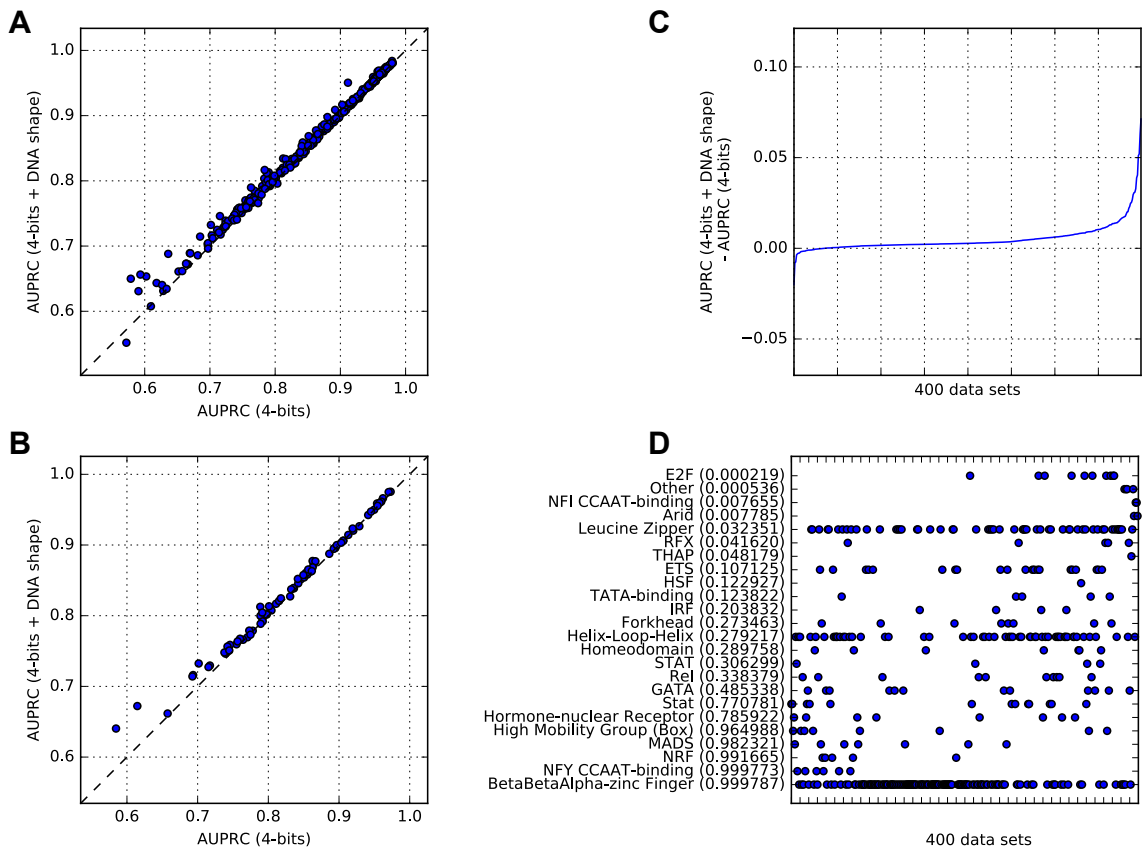

Related to Figure 2. Impact of DNA shape on predicting TFBSs. **A.** Comparison of the AUPRC obtained for the 400 ENCODE human ChIP-seq data sets when using either 4-bits (x-axis) or 4-bits + DNA shape (y-axis) classifiers (see (Zhou et al., 2015) for the 4-bits encoding). The dashed line represents equal AUPRC values obtained with the two methods. **B.** Comparison of the median AUPRC over all ChIP-seq data sets associated with each TF (one point per TF) when using either 4-bits (x-axis) or 4-bits + DNA shape (y-axis) classifiers. The dashed line represents equal AUPRC values obtained with the two methods. **C.** Improvement in predictive power obtained when considering DNA shape features (y-axis) as the difference between the AUPRC values obtained with the 4-bits + DNA shape and 4-bits classifiers. The higher the difference, the stronger the improvement when DNA shape information is incorporated. Note that the data sets (x-axis) were ranked by increasing difference values. **D.** For each TF family (y-axis), an associated data set is represented at the corresponding x-coordinate where the data set appears in B. The name of the TF families are given on the y-axis along with the Mann-Whitney U test p-values of enrichment for significant improvement in parenthesis. Note that the given p-values are not corrected for multiple hypothesis testing.

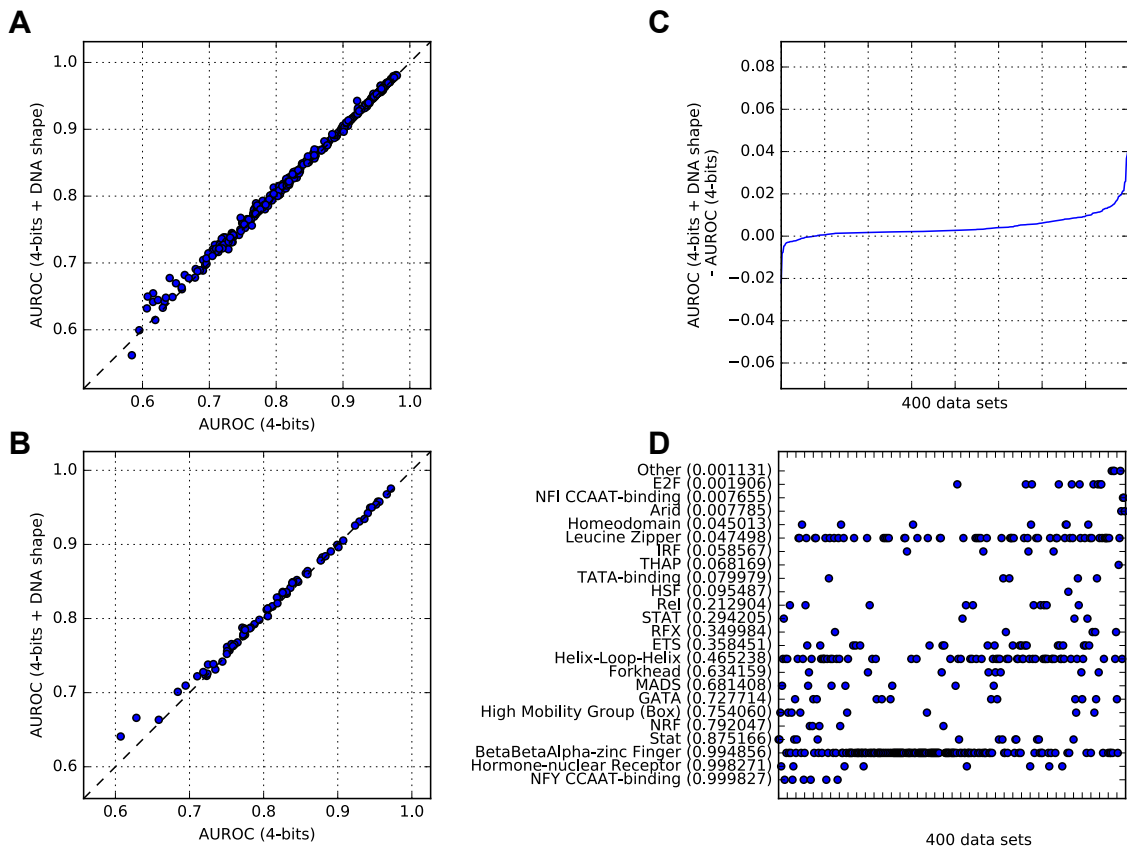

Related to Figure 2. Impact of DNA shape on predicting TFBSs. **A.** Comparison of the AUROC obtained for the 400 ENCODE human ChIP-seq data sets when using either 4-bits (x-axis) or 4-bits + DNA shape (y-axis) classifiers (see (Zhou et al., 2015) for the 4-bits encoding). The dashed line represents equal AUROC values obtained with the two methods. **B.** Comparison of the median AUROC over all ChIP-seq data sets associated with each TF (one point per TF) when using either 4-bits (x-axis) or 4-bits + DNA shape (y-axis) classifiers. The dashed line represents equal AUROC values obtained with the two methods. **C.** Improvement in predictive power obtained when considering DNA shape features (y-axis) as the difference between the AUROC values obtained with the 4-bits + DNA shape and 4-bits classifiers. The higher the difference, the stronger the improvement when DNA shape information is incorporated. Note that the data sets (x-axis) were ranked by increasing difference values. **D.** For each TF family (y-axis), an associated data set is represented at the corresponding x-coordinate where the data set appears in B. The name of the TF families are given on the y-axis along with the Mann-Whitney U test p-values of enrichment for significant improvement in parenthesis. Note that the given p-values are not corrected for multiple hypothesis testing.
