# Supplementary material
Source: PubMed Central journal article supplement (PMC5042832)
Supplement: NIHMS801211-supplement-5.pdf [file NIHMS801211-supplement-5.pdf]

## Data S5

# DNA shape features improve transcription factor binding site predictions *in vivo*

ANTHONY MATHÉLIER<sup>1,2</sup>, BEIBEI XIN<sup>3</sup>, TSU-PEI CHIU<sup>3</sup>,  
LIN YANG<sup>3</sup>, REMO ROHS<sup>3,\*</sup>, AND WYETH W. WASSERMAN<sup>1,\*</sup>

<sup>1</sup> Centre for Molecular Medicine at the Child and Family Research Institute,  
Department of Medical Genetics, University of British Columbia,  
980 West 28th Avenue, V5Z 4H4, Vancouver, BC, Canada

<sup>2</sup> Centre for Molecular Medicine Norway (NCMM), Nordic EMBL Partnership,  
University of Oslo and Oslo University Hospital, Norway

<sup>3</sup> Molecular and Computational Biology Program, Departments of Biological Sciences,  
Chemistry, Physics, and Computer Science,  
University of Southern California, Los Angeles, CA 90089, USA

\* Co-corresponding authors

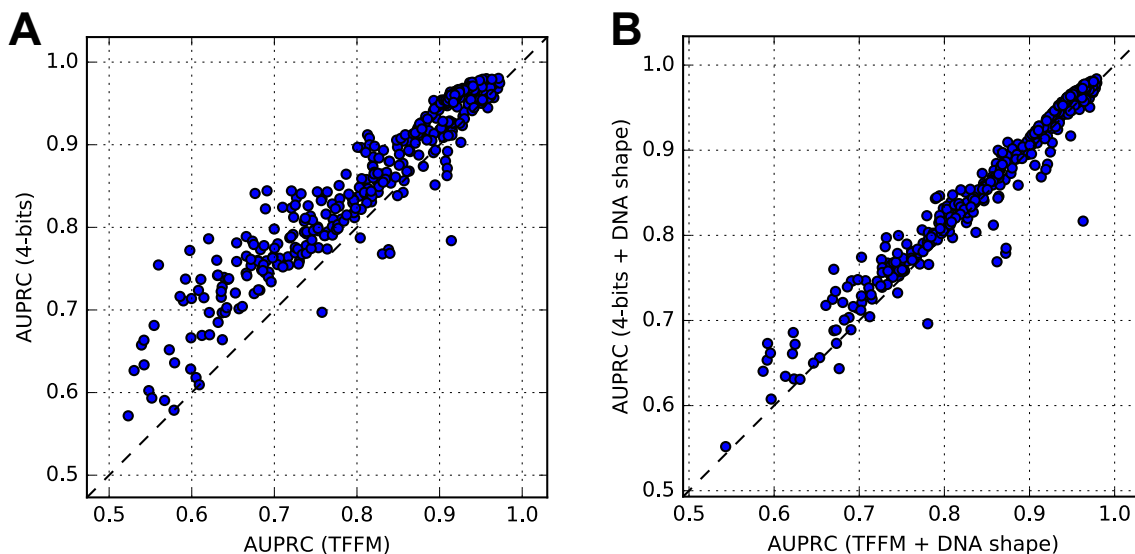

Related to Figure 3. Assessment of the predictive power of the TFFM and 4-bits approaches (see (Zhou et al., 2015) for the 4-bits encoding) to predict TFBSs in ChIP-seq regions. Comparison of the AUPRC obtained for the 400 human ENCODE ChIP-seq data sets when **A**. TFFM scores (x-axis) and 4-bits classifiers (y-axis) and **B**. TFFM + DNA shape (x-axis) and 4-bits + DNA shape (y-axis) classifiers are considered.

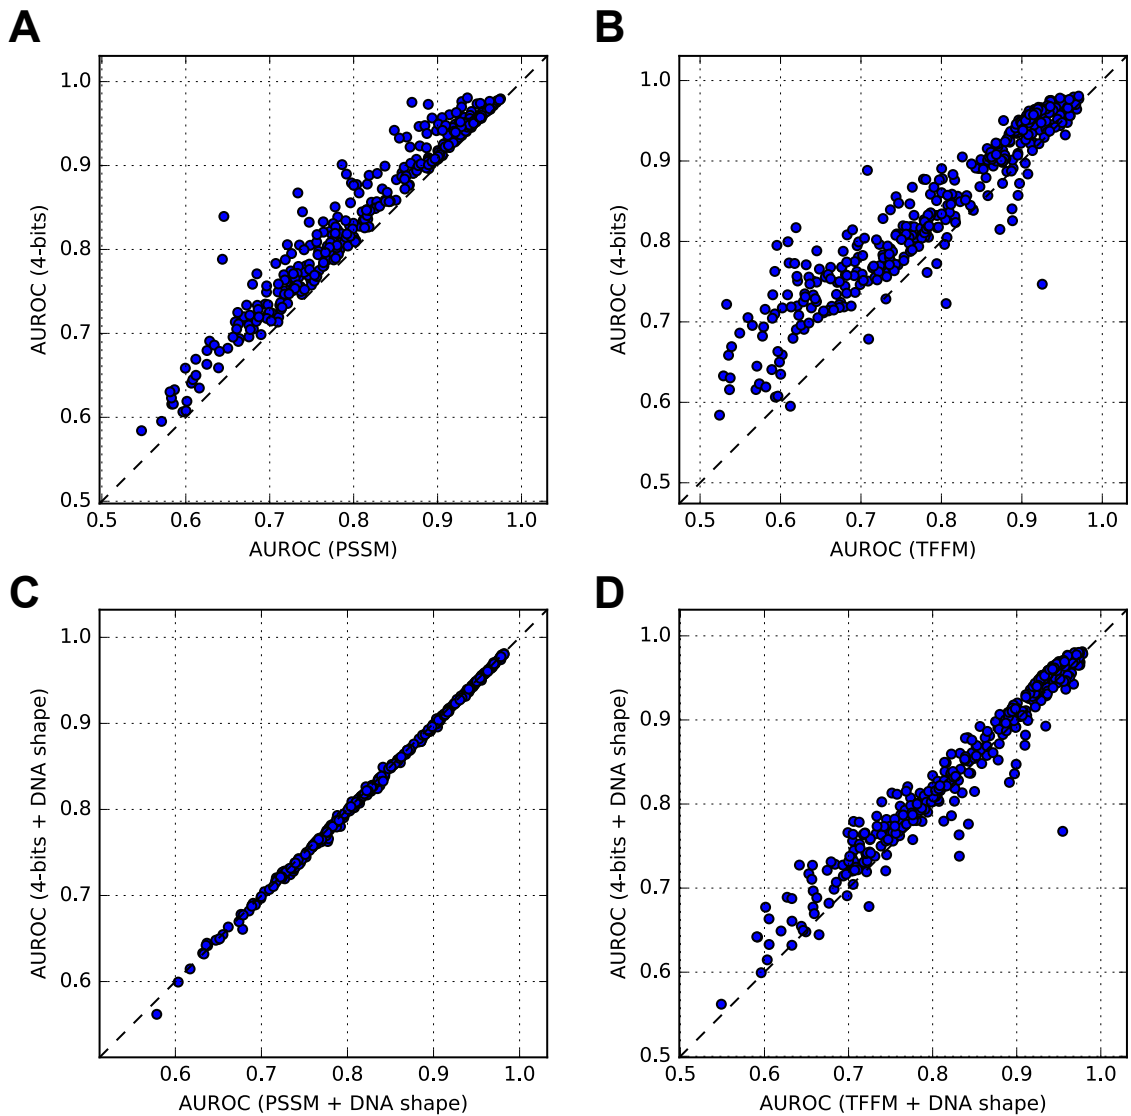

Related to Figure 3. Assessment of the predictive power of the PSSM, TFFM, and 4-bits approaches (see (Zhou et al., 2015) for the 4-bits encoding) to predict TFBSs in ChIP-seq regions. Comparison of the AUROC obtained for the 400 human ENCODE ChIP-seq data sets when **A.** PSSM scores (x-axis) and 4-bits classifiers (y-axis), **B.** TFFM scores (x-axis) and 4-bits classifiers (y-axis), **C.** PSSM + DNA shape (x-axis) and 4-bits + DNA shape (y-axis) classifiers, and **D.** TFFM + DNA shape (x-axis) and 4-bits + DNA shape (y-axis) classifiers are considered.

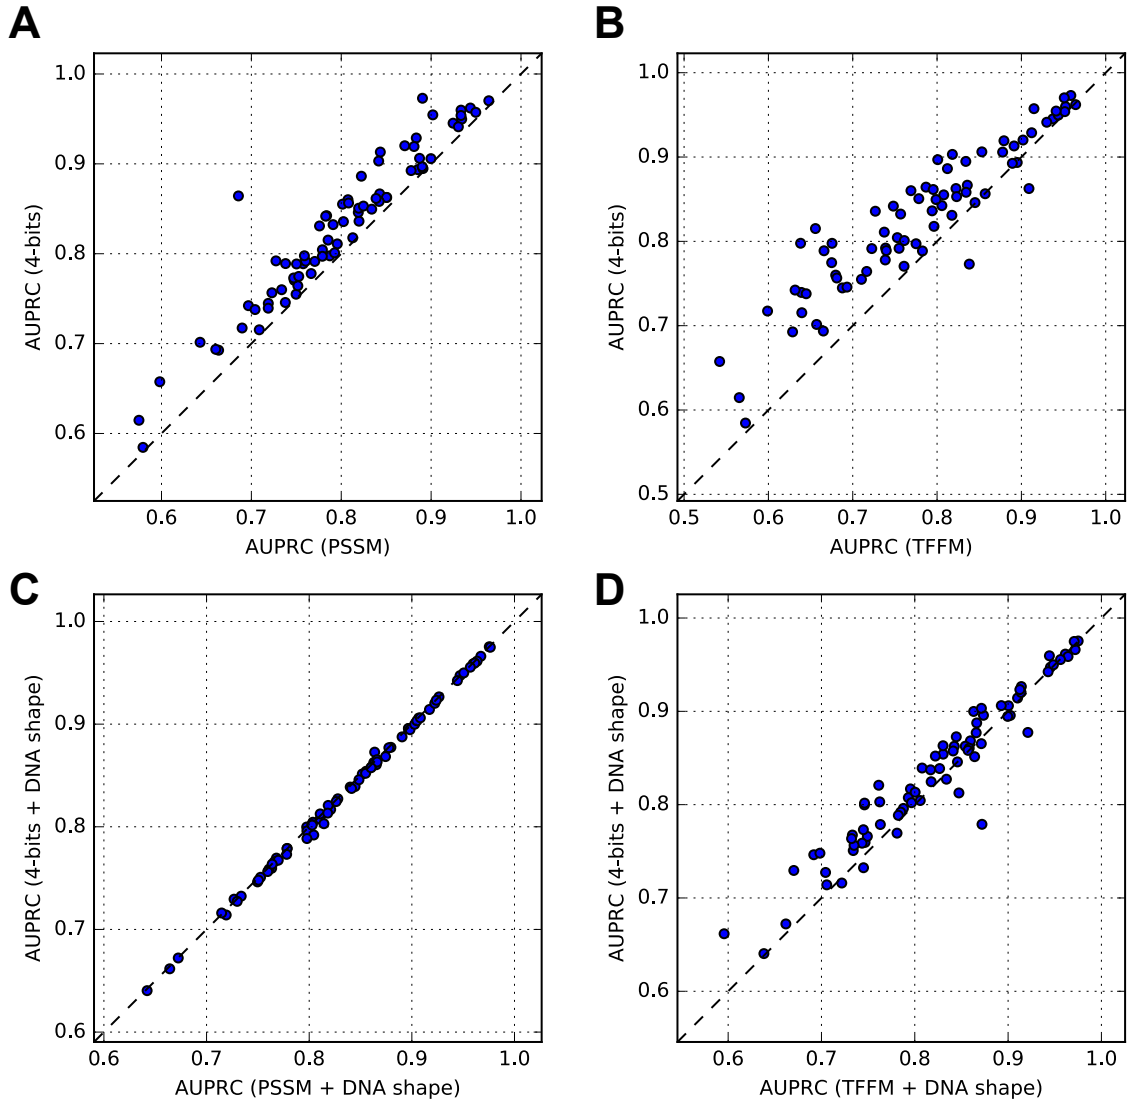

Related to Figure 3. Assessment of the predictive power of the PSSM, TFFM, and 4-bits approaches (see (Zhou et al., 2015) for the 4-bits encoding) to predict TFBSs in ChIP-seq regions. Comparison of the median AUPRC over all human ENCODE ChIP-seq data sets associated with each TF (one point per TF) when **A.** PSSM scores (x-axis) and 4-bits classifiers (y-axis), **B.** TFFM scores (x-axis) and 4-bits classifiers (y-axis), **C.** PSSM + DNA shape (x-axis) and 4-bits + DNA shape (y-axis) classifiers, and **D.** TFFM + DNA shape (x-axis) and 4-bits + DNA shape (y-axis) classifiers are considered.

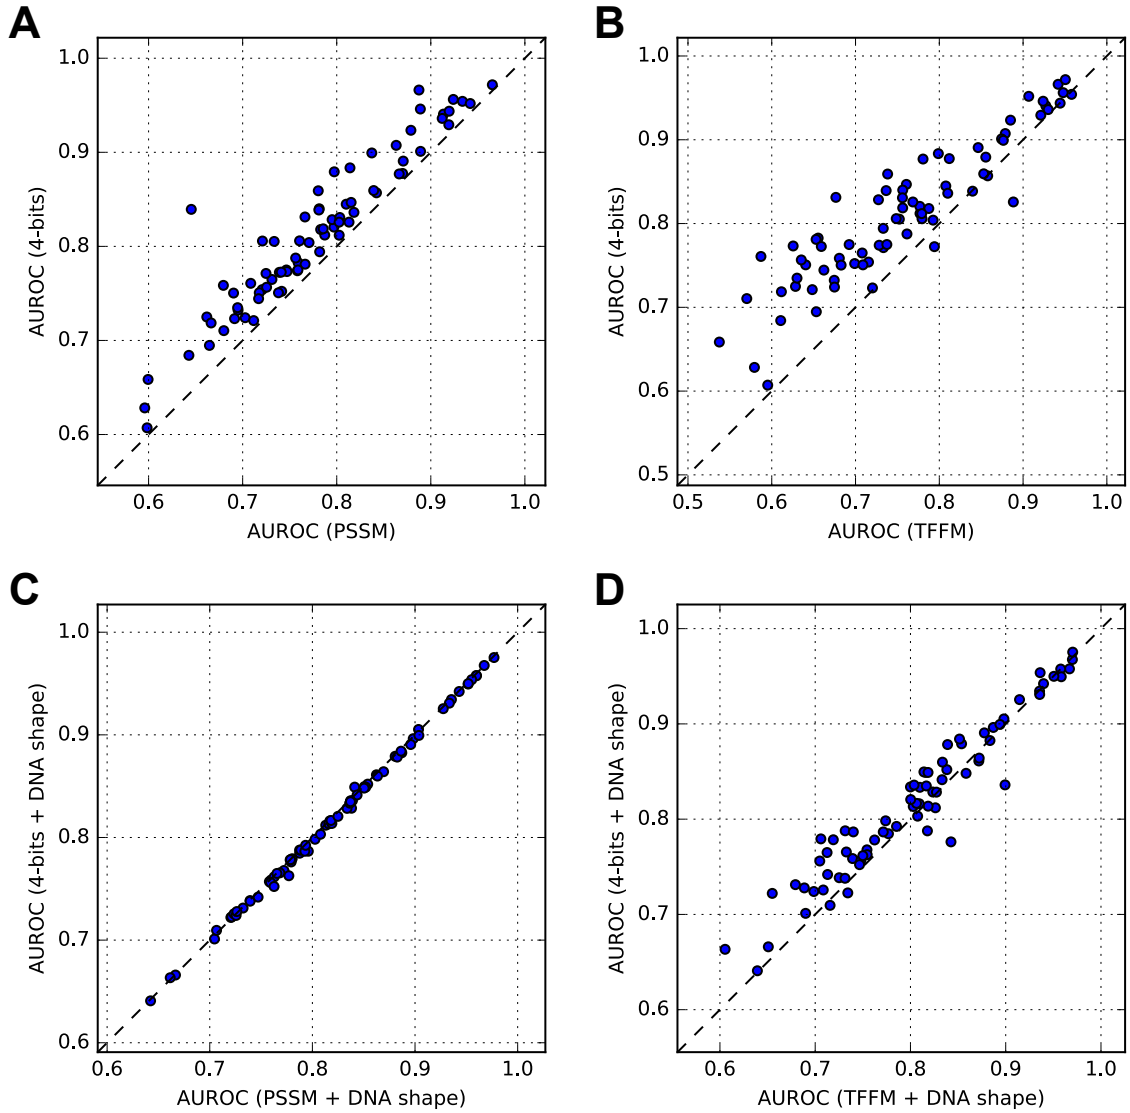

Related to Figure 3. Assessment of the predictive power of the PSSM, TFFM, and 4-bits approaches (see (Zhou et al., 2015) for the 4-bits encoding) to predict TFBSs in ChIP-seq regions. Comparison of the median AUPRC over all human ENCODE ChIP-seq data sets associated with each TF (one point per TF) when **A.** PSSM scores (x-axis) and 4-bits classifiers (y-axis), **B.** TFFM scores (x-axis) and 4-bits classifiers (y-axis), **C.** PSSM + DNA shape (x-axis) and 4-bits + DNA shape (y-axis) classifiers, and **D.** TFFM + DNA shape (x-axis) and 4-bits + DNA shape (y-axis) classifiers are considered.
