# Supplementary material
Source: PubMed Central journal article supplement (PMC5042832)
Supplement: NIHMS801211-supplement-6.pdf [file NIHMS801211-supplement-6.pdf]

## Data S6

# DNA shape features improve transcription factor binding site prediction *in vivo*

ANTHONY MATHÉLIER<sup>1,2</sup>, BEIBEI XIN<sup>3</sup>, TSU-PEI CHIU<sup>3</sup>,  
LIN YANG<sup>3</sup>, REMO ROHS<sup>3,\*</sup>, AND WYETH W. WASSERMAN<sup>1,\*</sup>

<sup>1</sup> Centre for Molecular Medicine at the Child and Family Research Institute,  
Department of Medical Genetics, University of British Columbia,  
980 West 28th Avenue, V5Z 4H4, Vancouver, BC, Canada

<sup>2</sup> Centre for Molecular Medicine Norway (NCMM), Nordic EMBL partnership,  
University of Oslo and Oslo University Hospital, Norway

<sup>3</sup> Molecular and Computational Biology Program, Departments of Biological Sciences,  
Chemistry, Physics, and Computer Science,  
University of Southern California, Los Angeles, CA 90089, USA

\* Co-corresponding authors

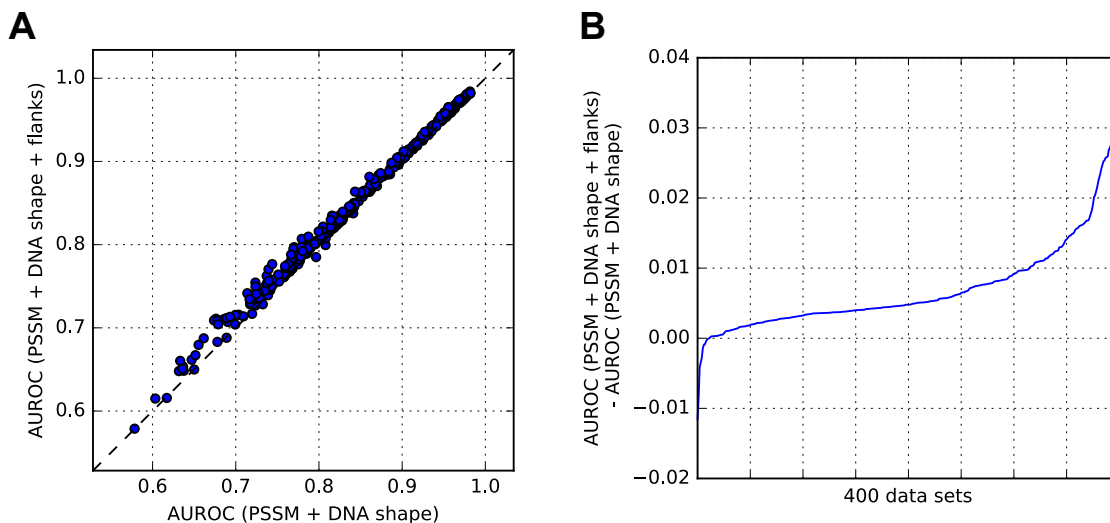

Related to Figure 4. Assessment of the predictive power of DNA shape features at TFBS flanking regions. **A.** Comparison of the AUROC obtained for the 400 human ENCODE ChIP-seq data sets when using the classifiers combining PSSM scores and DNA shape features at the core TFBSs (x-axis) and the classifiers combining PSSM scores and DNA shape features at both the core TFBSs and the surrounding 15 bp on each side (y-axis). The dashed line represents equal AUROC values for the two methods. **B.** AUROC value differences (y-axis) between the flank-augmented classifiers and the PSSM + DNA shape classifiers. Data sets (x-axis) are ranked by increasing difference values.

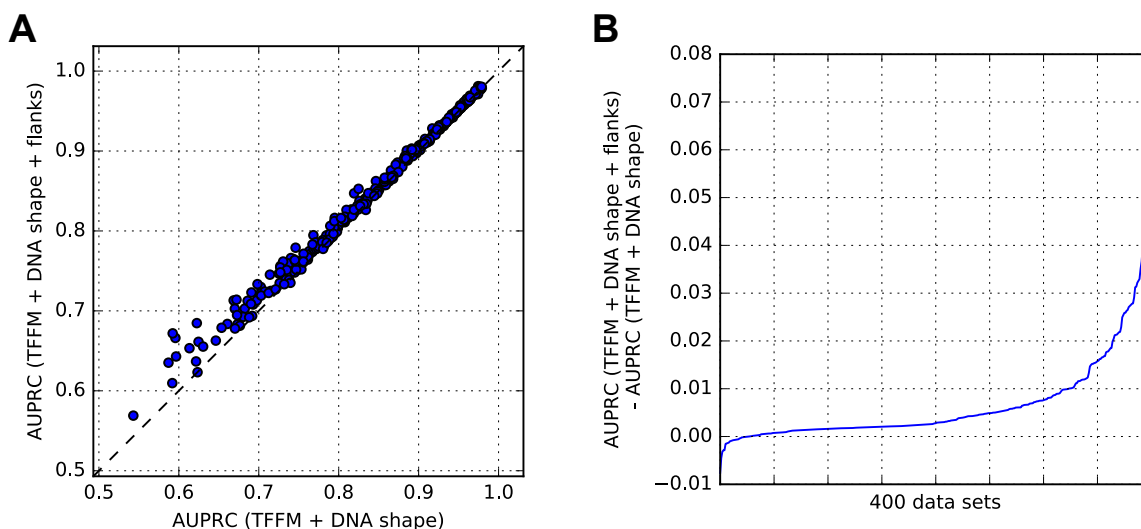

Related to Figure 4. Assessment of the predictive power of DNA shape features at TFBS flanking regions. **A.** Comparison of the AUPRC obtained for the 400 human ENCODE ChIP-seq data sets when using the classifiers combining TFFM scores and DNA shape features at the core TFBSs (*x*-axis) and the classifiers combining TFFM scores and DNA shape features at both the core TFBSs and the surrounding 15 bp on each side (*y*-axis). The dashed line represents equal AUPRC values for the two methods. **B.** AUPRC value differences (*y*-axis) between the flank-augmented classifiers and the TFFM + DNA shape classifiers. Data sets (*x*-axis) are ranked by increasing difference values.

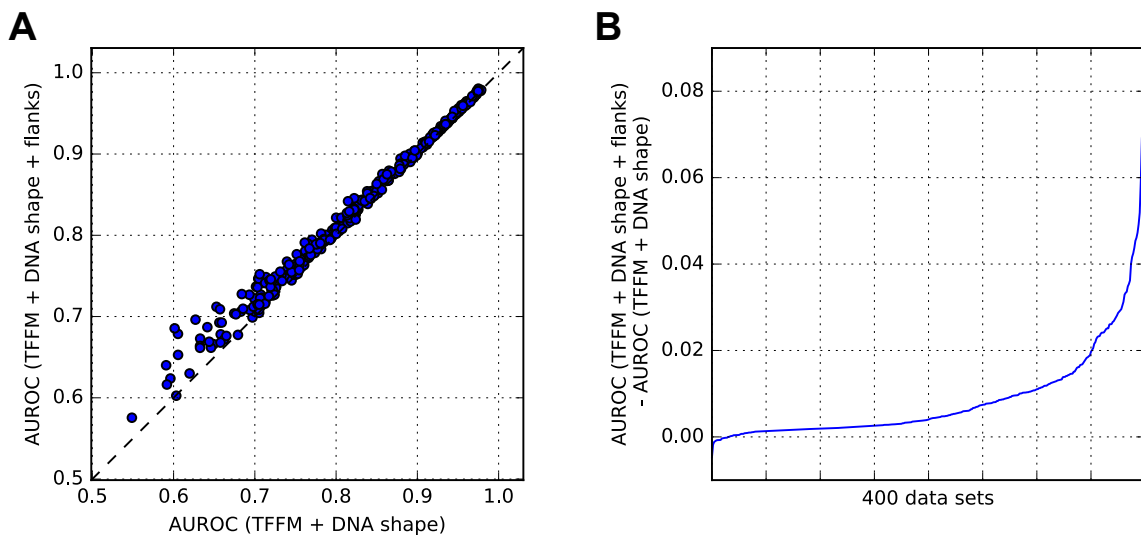

Related to Figure 4. Assessment of the predictive power of DNA shape features at TFBS flanking regions. **A.** Comparison of the AUROC obtained for the 400 human ENCODE ChIP-seq data sets when using the classifiers combining TFFM scores and DNA shape features at the core TFBSs (*x*-axis) and the classifiers combining TFFM scores and DNA shape features at both the core TFBSs and the surrounding 15 bp on each side (*y*-axis). The dashed line represents equal AUROC values for the two methods. **B.** AUROC value differences (*y*-axis) between the flank-augmented classifiers and the TFFM + DNA shape classifiers. Data sets (*x*-axis) are ranked by increasing difference values.

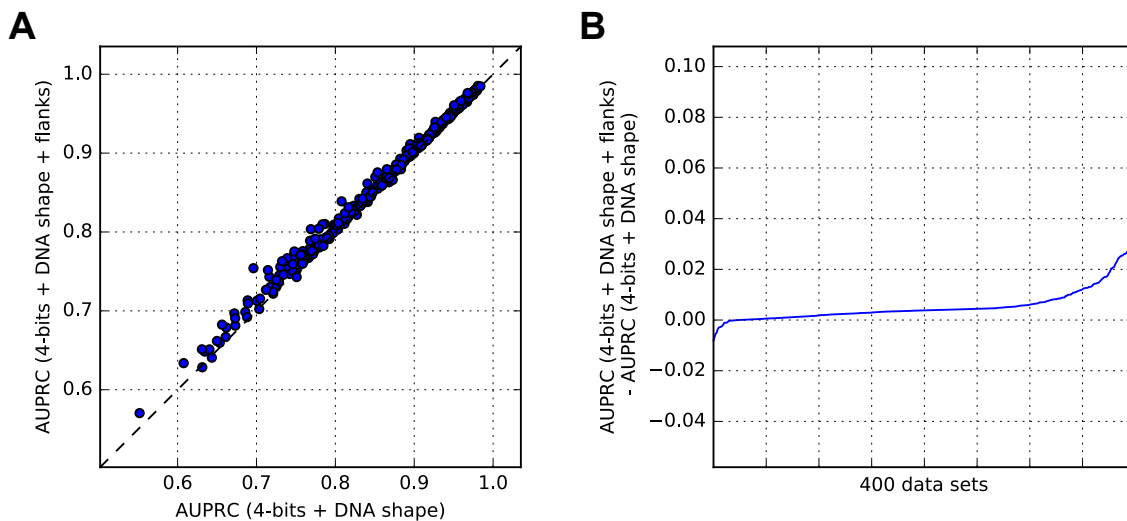

Related to Figure 4. Assessment of the predictive power of DNA shape features at TFBS flanking regions. **A.** Comparison of the AUPRC obtained for the 400 human ENCODE ChIP-seq data sets when using the 4-bits + DNA shape classifiers (considering DNA shape features at the core TFBSs; see (Zhou et al., 2015) for the 4-bits encoding) (x-axis) and the same classifiers where DNA shape features at both the core TFBSs and the surrounding 15 bp on each side were considered (y-axis). The dashed line represents equal AUPRC values for the two methods. **B.** AUPRC value differences (y-axis) between the flank-augmented classifiers and the 4-bits + DNA shape classifiers. Data sets (x-axis) are ranked by increasing difference values.

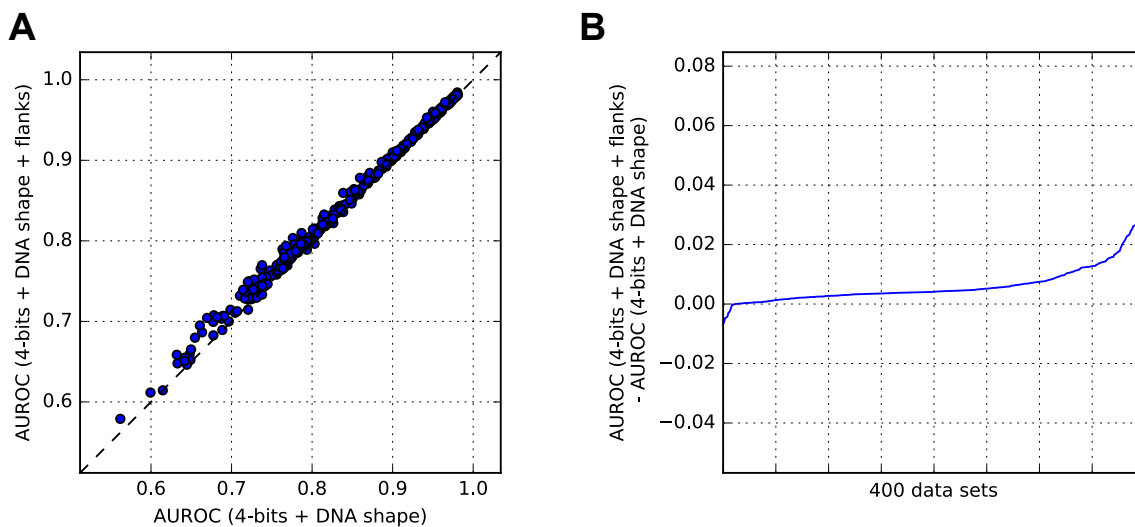

Related to Figure 4. Assessment of the predictive power of DNA shape features at TFBS flanking regions. **A.** Comparison of the AUROC obtained for the 400 human ENCODE ChIP-seq data sets when using the 4-bits + DNA shape classifiers (considering DNA shape features at the core TFBSs; see (Zhou et al., 2015) for the 4-bits encoding) (x-axis) and the same classifiers where DNA shape features at both the core TFBSs and the surrounding 15 bp on each side were considered (y-axis). The dashed line represents equal AUROC values for the two methods. **B.** AUROC value differences (y-axis) between the flank-augmented classifiers and the 4-bits + DNA shape classifiers. Data sets (x-axis) are ranked by increasing difference values.
